# Supplementary material for: Quantitative high-throughput assay to measure MC4R-induced intracellular calcium
Source: PubMed Central journal article supplement (PMC8111326; doi:10.1530/jme-20-0285), 2021-03-19
Supplement: supplementary_figure_1.pdf [file supplementary_figure_1.pdf]

Figure S1

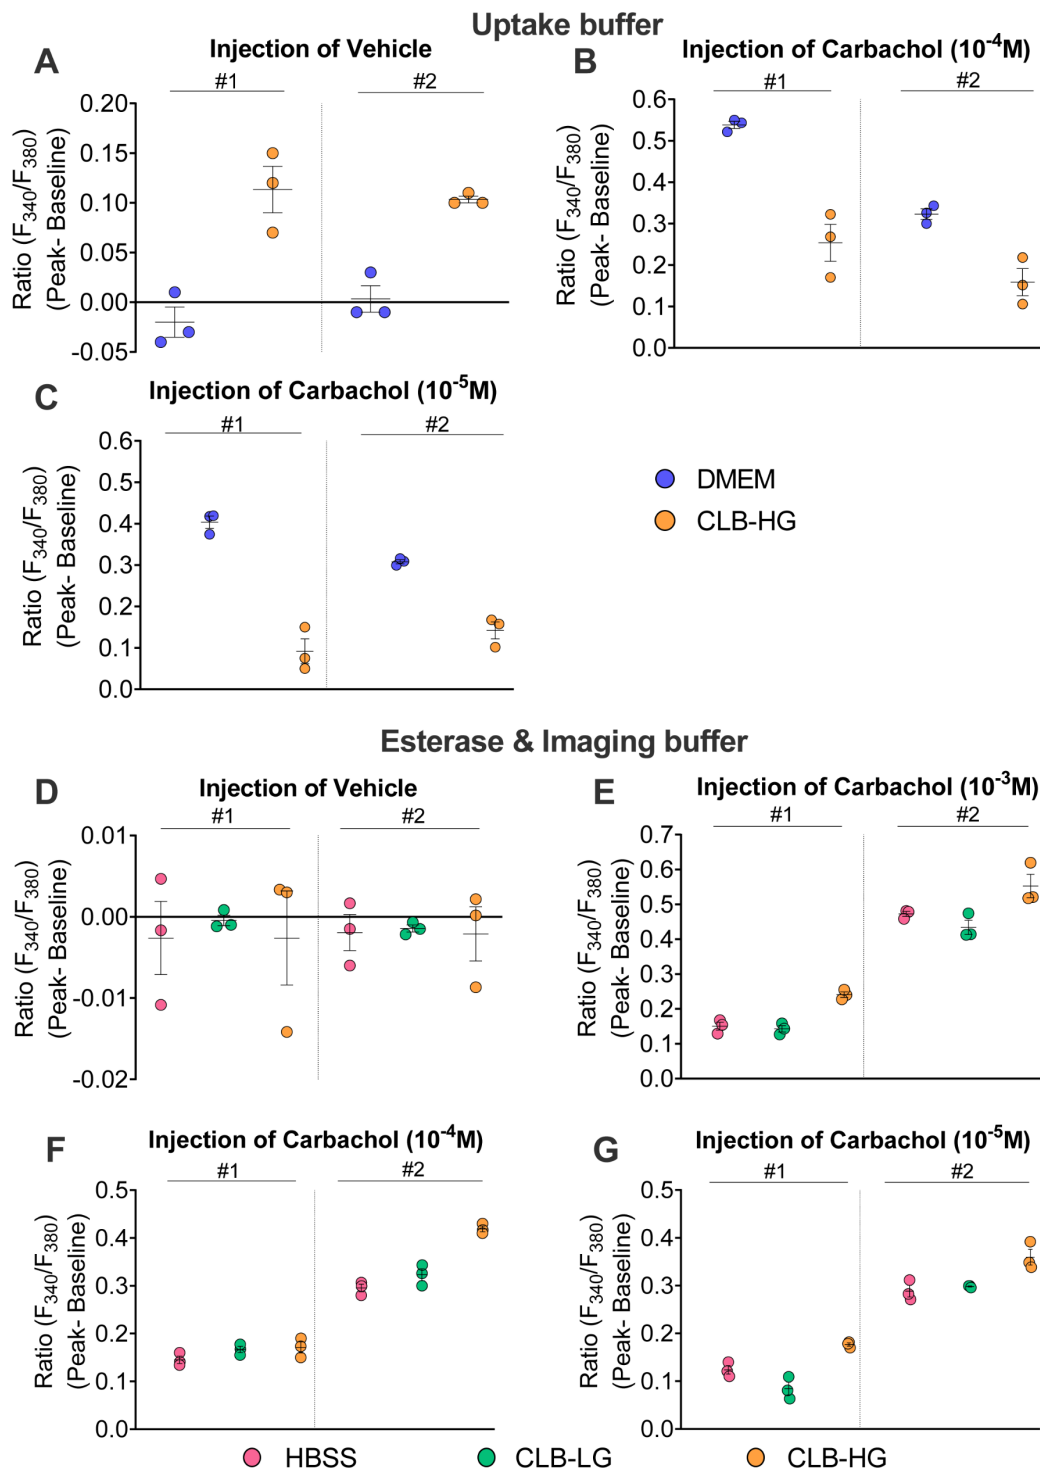

**Figure S1: Optimal buffer for Fura-2/AM loading is DMEM, and optimal buffer for esterase cleavage and calcium imaging is CLB-HG.** Cells were tested for vehicle-induced stretch-activated calcium response (A & D) and carbachol (B, C & E-G) induced calcium signal. Data shown as mean  $\pm$  S.E.M for two independent experiments with three replicates in each experiment.
