# Supplementary material for: Quantitative high-throughput assay to measure MC4R-induced intracellular calcium
Source: PubMed Central journal article supplement (PMC8111326; doi:10.1530/jme-20-0285), 2021-03-19
Supplement: supplementary_figure_2.pdf [file supplementary_figure_2.pdf]

Figure S2

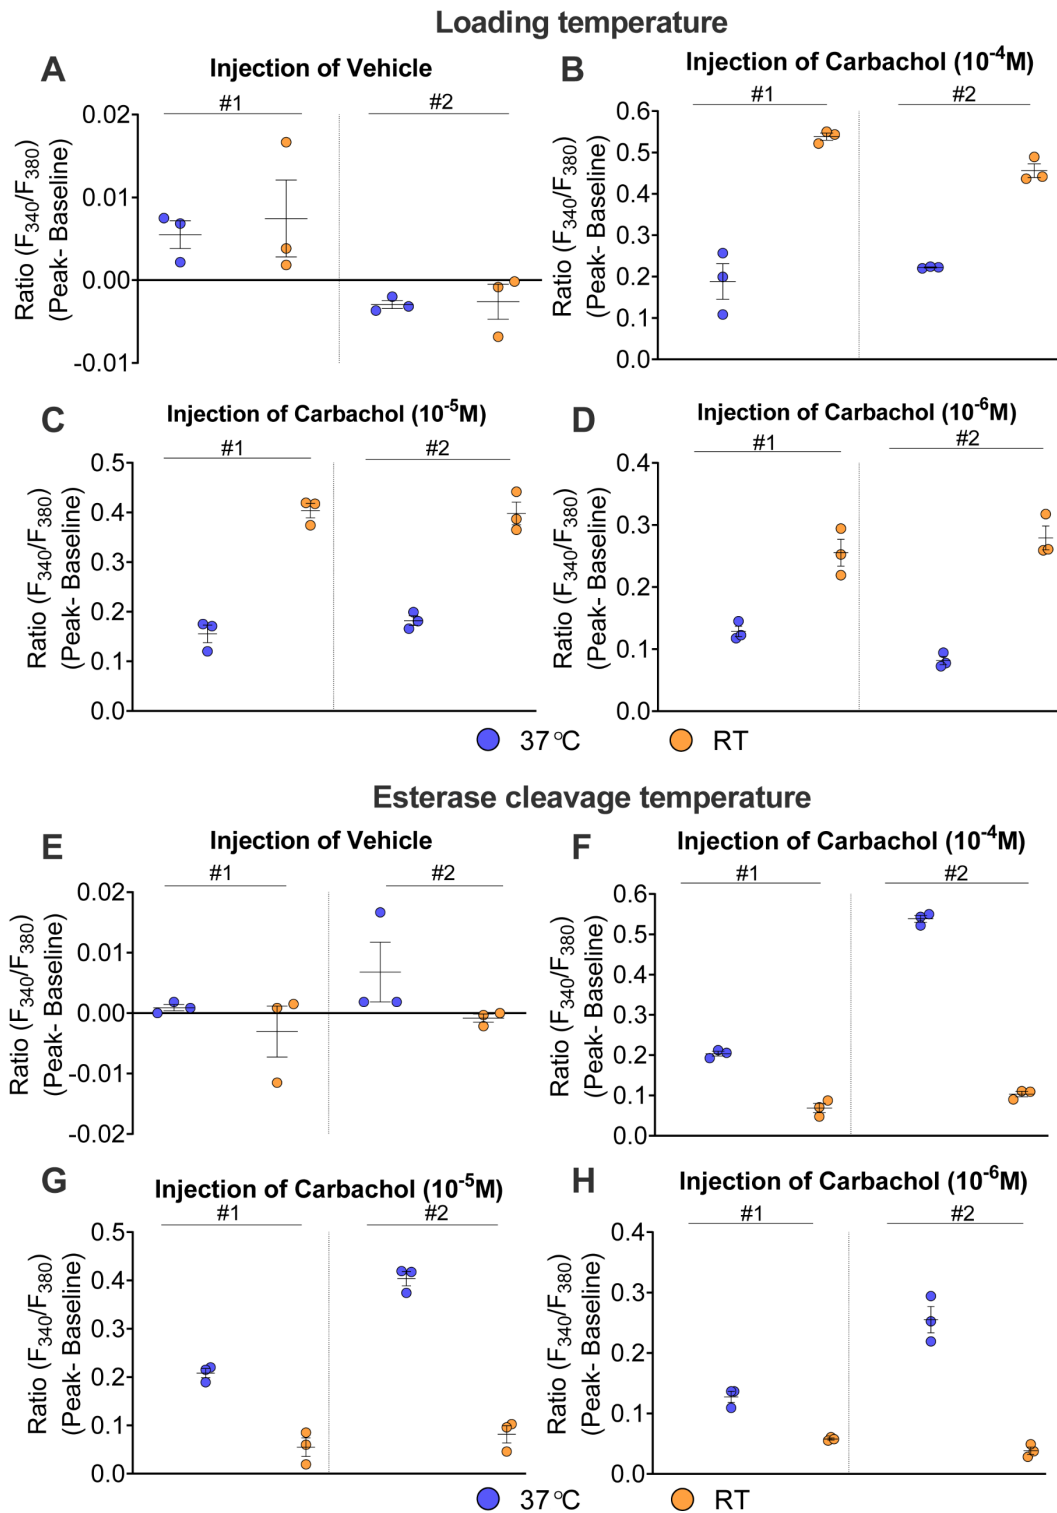

**Figure S2: Optimal temperature for Fura-2/AM loading is room temperature, and the optimal temperature for esterase cleavage of Fura-2/AM is 37°C.** Cells were tested for vehicle-induced stretch-activated calcium response (A & E) and carbachol (B-D & F-H) induced calcium signal. Data shown as mean  $\pm$  S.E.M for two independent experiments with three replicates in each experiment.
