# Supplementary material for: Quantitative high-throughput assay to measure MC4R-induced intracellular calcium
Source: PubMed Central journal article supplement (PMC8111326; doi:10.1530/jme-20-0285), 2021-03-19
Supplement: supplementary_figure_3.pdf [file supplementary_figure_3.pdf]

Figure S3

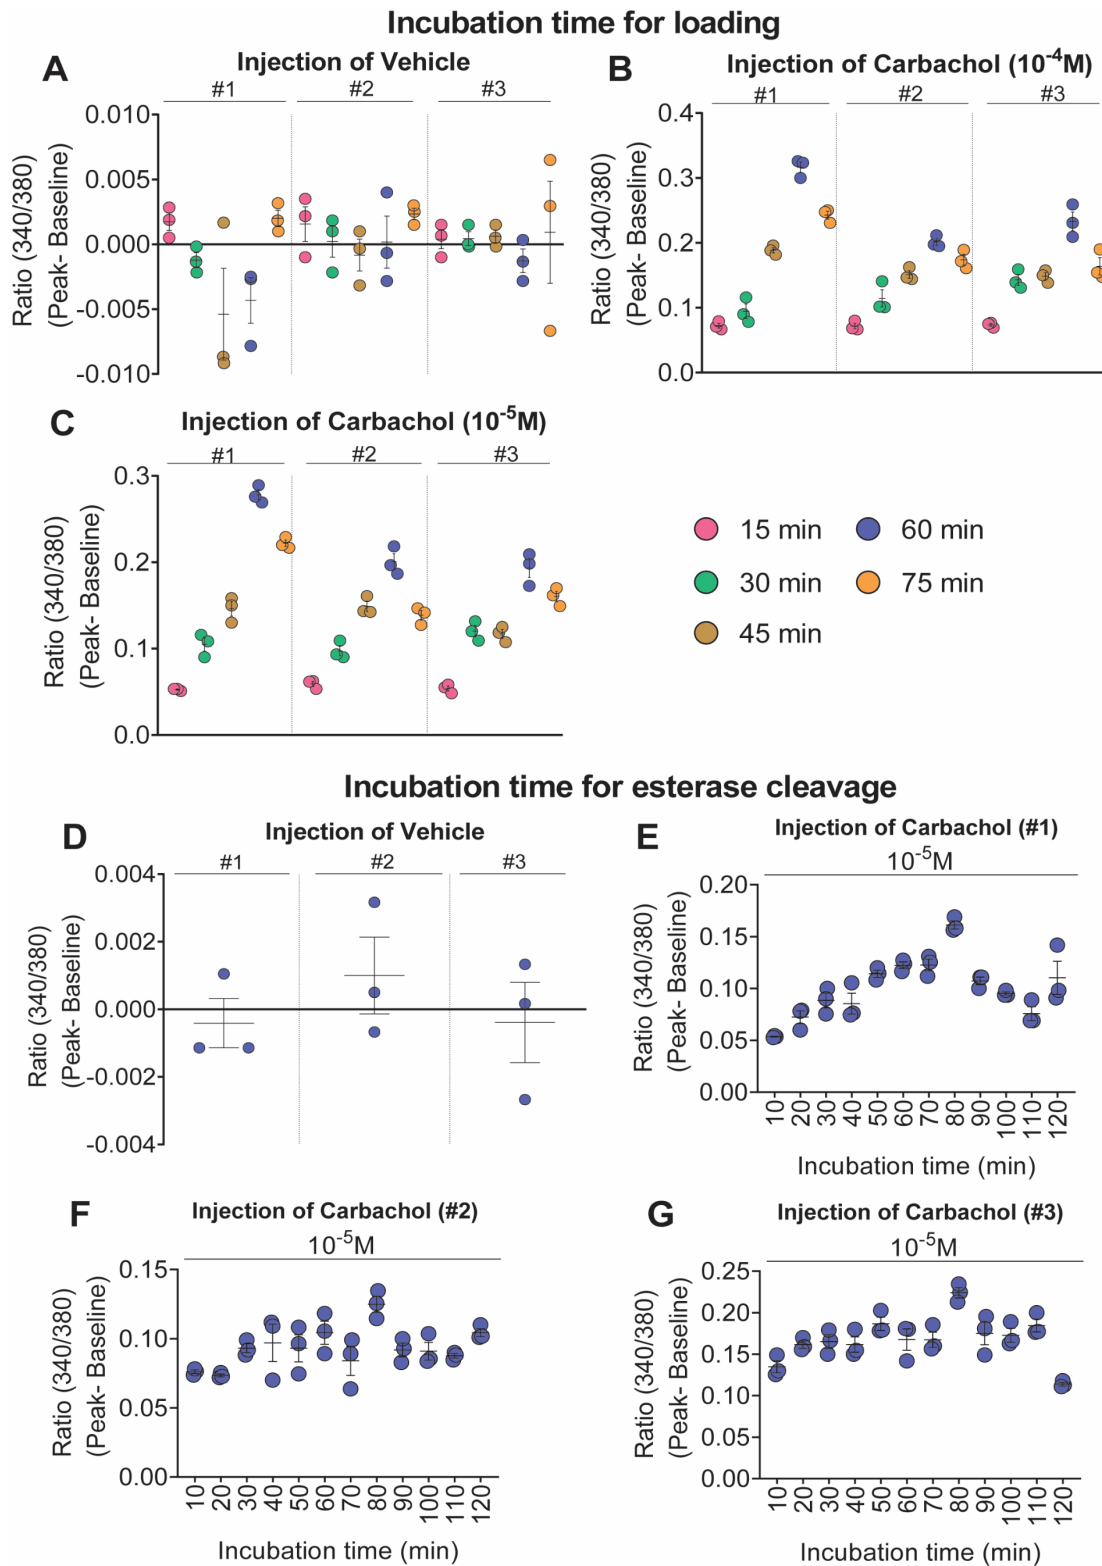

**Figure S3: Optimal incubation time for Fura-2/AM loading is 60 min, and optimal incubation time for cytosolic esterase cleavage of Fura-2/AM is 80 min.** Cells were tested for vehicle-induced stretch-activated calcium response (A & D) and carbachol (B, C & E-G) induced calcium signal. Data shown as mean  $\pm$  S.E.M for three independent experiments with three replicates in each experiment.
