# Supplementary material for: Quantitative high-throughput assay to measure MC4R-induced intracellular calcium
Source: PubMed Central journal article supplement (PMC8111326; doi:10.1530/jme-20-0285), 2021-03-19
Supplement: supplementary_figure_4.pdf [file supplementary_figure_4.pdf]

**Figure S4**

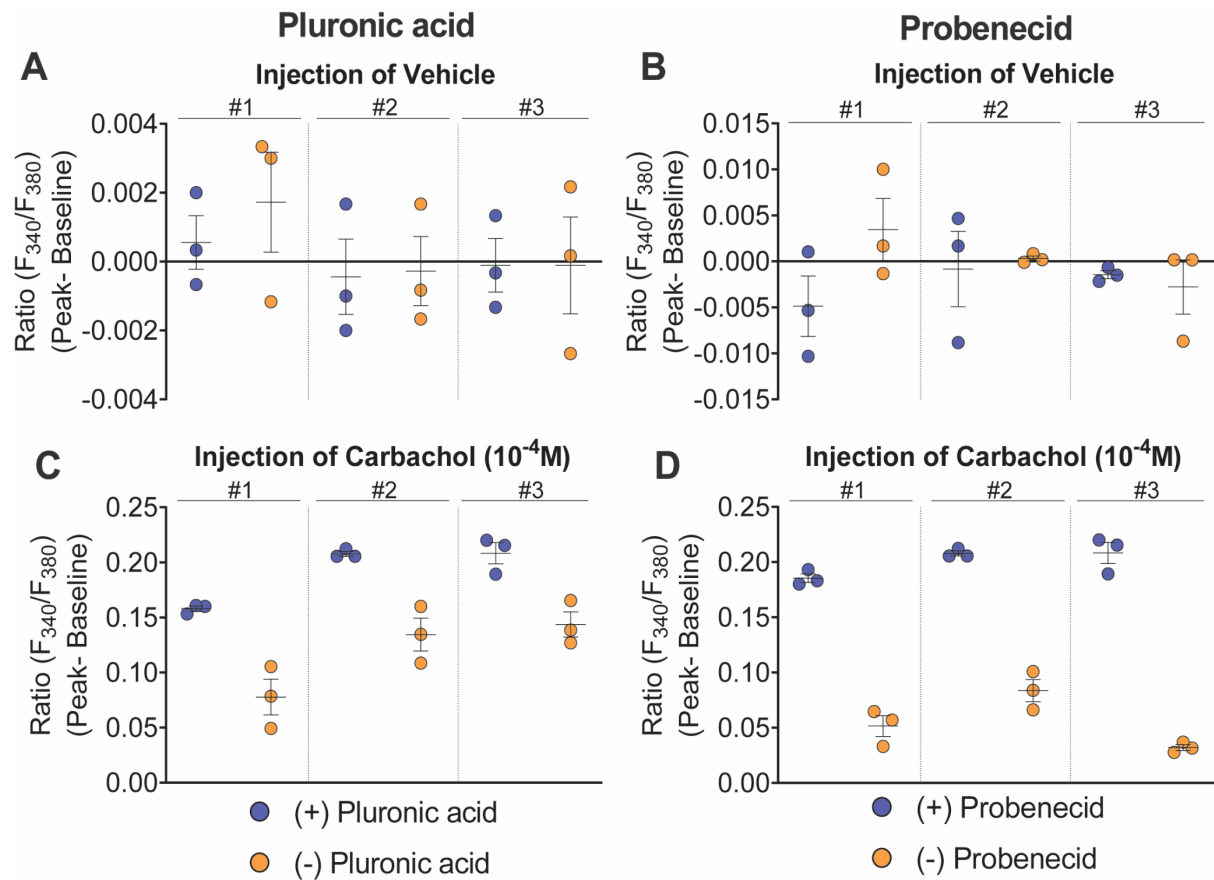

**Figure S4: Addition of pluronic acid to loading buffer and probenecid to both loading and esterase cleavage buffers is needed for optimal Fura-2/AM loading and calcium imaging.** Cells were tested for vehicle-induced stretch-activated calcium response (A & B) and carbachol (C & D) induced calcium signal. Data shown as mean  $\pm$  S.E.M for three independent experiments with three replicates in each experiment.
