# Supplementary material for: Quantitative high-throughput assay to measure MC4R-induced intracellular calcium
Source: PubMed Central journal article supplement (PMC8111326; doi:10.1530/jme-20-0285), 2021-03-19
Supplement: supplementary_figure_5.pdf [file supplementary_figure_5.pdf]

**Figure S5**

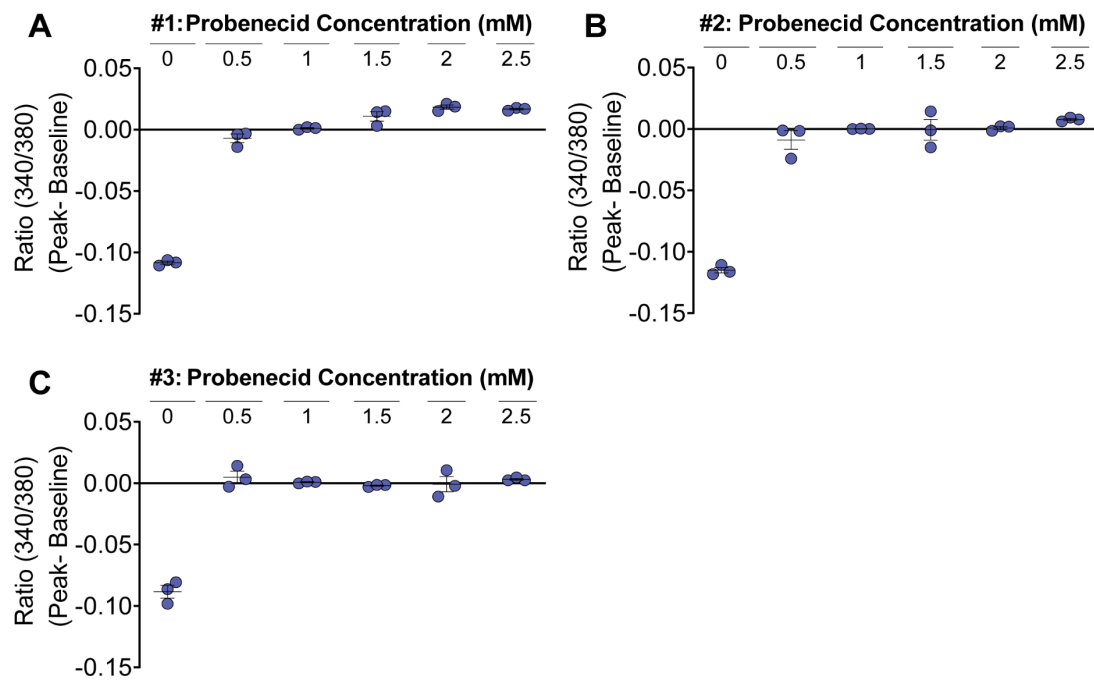

**Figure S5: EGTA chelation of calcium tested with various concentrations of probenecid.** Cells loaded with Fura-2/AM in the absence or presence of probenecid (0.5 - 2.5 mM) were stimulated with EGTA (A-C). Data shown as mean  $\pm$  S.E.M for three independent experiments with three replicates in each experiment.
