# Supplementary material for: Quantitative high-throughput assay to measure MC4R-induced intracellular calcium
Source: PubMed Central journal article supplement (PMC8111326; doi:10.1530/jme-20-0285), 2021-03-19
Supplement: supplementary_figure_6.pdf [file supplementary_figure_6.pdf]

Figure S6

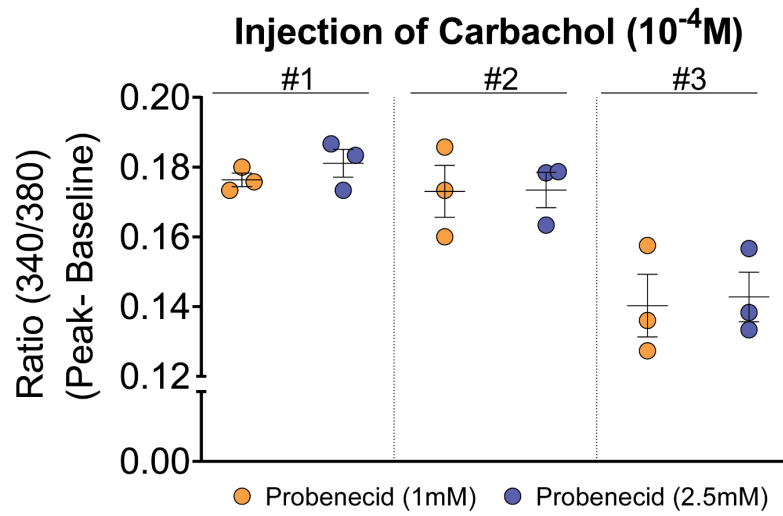

**Figure S6: Carbachol-stimulated calcium response in the presence of different concentrations of probenecid.** Fura-2/AM loaded cells were stimulated with carbachol  $10^{-4}\text{M}$  following the addition of probenecid (1 mM or 2.5 mM) to the esterase cleavage buffer. Data shown as mean  $\pm$  S.E.M for three independent experiments with three replicates in each experiment.
