# Supplementary material for: Quantitative high-throughput assay to measure MC4R-induced intracellular calcium
Source: PubMed Central journal article supplement (PMC8111326; doi:10.1530/jme-20-0285), 2021-03-19
Supplement: supplementary_figure_8.pdf [file supplementary_figure_8.pdf]

Figure S8

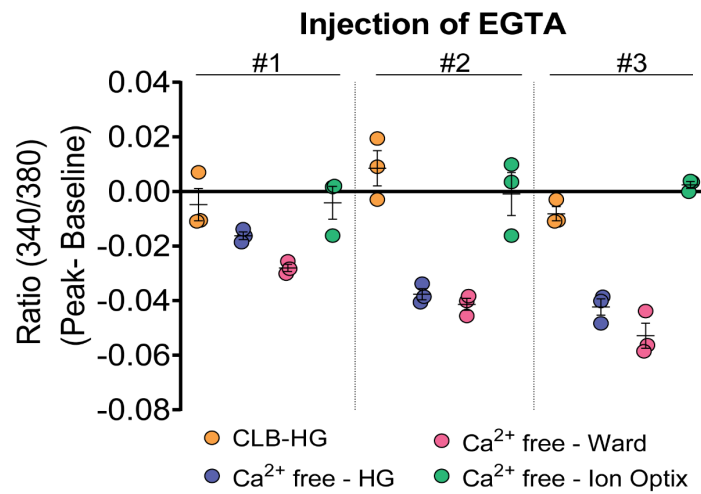

**Figure S8: Addition of EGTA to Fura-2/AM and EGTA co-loaded cells chelates calcium in Ca<sup>2+</sup>-free-HG and Ca<sup>2+</sup>-free-Ward buffers.** Cells co-loaded with Fura-2/AM and 10 $\mu$ M EGTA were stimulated with a further dose of 5.5 mM EGTA. Data shown as mean  $\pm$  S.E.M for three independent experiments with three replicates in each experiment.
