# Supplementary material for: Quantitative high-throughput assay to measure MC4R-induced intracellular calcium
Source: PubMed Central journal article supplement (PMC8111326; doi:10.1530/jme-20-0285), 2021-03-19
Supplement: supplementary_table_1.pdf [file supplementary_table_1.pdf]

(+) = activation of stretch receptor; (-) = no activation of stretch receptor; (n) = no data available.

Data collated from three independent experiments with each condition tested in triplicate (n=9).

Green shading = The optimal injection speed and injection volume chosen for use with cell monolayers. Based on these data, a 10  $\mu\text{L}$  injection volume injected at 100  $\mu\text{L}/\text{s}$  onto 290  $\mu\text{L}$  buffer covering the cell monolayer prevented stretch-activated calcium response. The final buffer volume in each well was always maintained at 300  $\mu\text{L}$ .
