# Supplementary material for: Quantitative high-throughput assay to measure MC4R-induced intracellular calcium
Source: PubMed Central journal article supplement (PMC8111326; doi:10.1530/jme-20-0285), 2021-03-19
Supplement: supplementary_table_2.pdf [file supplementary_table_2.pdf]

**Table S2: Results for optimisation of injection volume and injection speed on HEK293 cell suspensions to eliminate vehicle-induced stretch-activated calcium response.**

|                               |                   | <b>100</b>        |           |           | <b>115</b> |           |           | <b>130</b> |           |           | <b>150</b> |           |           |   |   |   |   |   |   |   |   |   |   |   |   |   |   |   |   |   |   |   |   |   |   |   |   |   |
|-------------------------------|-------------------|-------------------|-----------|-----------|------------|-----------|-----------|------------|-----------|-----------|------------|-----------|-----------|---|---|---|---|---|---|---|---|---|---|---|---|---|---|---|---|---|---|---|---|---|---|---|---|---|
| <b>Injection speed (µL/s)</b> |                   |                   |           |           |            |           |           |            |           |           |            |           |           |   |   |   |   |   |   |   |   |   |   |   |   |   |   |   |   |   |   |   |   |   |   |   |   |   |
| <b>Injection volume (µL)</b>  |                   | <b>10</b>         | <b>20</b> | <b>30</b> | <b>10</b>  | <b>20</b> | <b>30</b> | <b>10</b>  | <b>20</b> | <b>30</b> | <b>10</b>  | <b>20</b> | <b>30</b> |   |   |   |   |   |   |   |   |   |   |   |   |   |   |   |   |   |   |   |   |   |   |   |   |   |
|                               |                   | <b>Replicates</b> |           |           |            |           |           |            |           |           |            |           |           |   |   |   |   |   |   |   |   |   |   |   |   |   |   |   |   |   |   |   |   |   |   |   |   |   |
| <b>Final Well volume (µL)</b> | <b>Experiment</b> | 1                 | 2         | 3         | 1          | 2         | 3         | 1          | 2         | 3         | 1          | 2         | 3         | 1 | 2 | 3 | 1 | 2 | 3 | 1 | 2 | 3 | 1 | 2 | 3 | 1 | 2 | 3 | 1 | 2 | 3 |   |   |   |   |   |   |   |
| <b>290</b>                    | 1                 | -                 | +         | -         | -          | -         | -         | -          | +         | -         | -          | -         | -         | + | - | - | - | - | - | - | - | - | - | - | - | - | + | - | - | - | + | - | - | - | - |   |   |   |
|                               | 2                 | -                 | -         | -         | -          | -         | -         | -          | -         | -         | -          | -         | -         | - | - | - | - | - | - | - | - | - | - | - | - | - | - | - | - | - | - | - | - | - | - |   |   |   |
|                               | 3                 | -                 | -         | -         | -          | -         | -         | -          | -         | -         | +          | -         | -         | - | - | - | - | - | - | - | - | - | - | - | - | - | - | - | - | - | - | - | - | - | - | - |   |   |
| <b>280</b>                    | 1                 | -                 | -         | -         | -          | +         | -         | -          | -         | -         | -          | -         | -         | - | - | + | - | - | - | - | - | - | - | - | - | - | - | - | - | - | - | - | - | - | + | - | - | - |
|                               | 2                 | -                 | -         | -         | -          | -         | -         | -          | -         | -         | -          | -         | -         | - | - | - | - | - | - | - | - | - | - | - | - | - | - | - | - | - | - | - | - | - | - | - | + | - |
|                               | 3                 | +                 | -         | -         | -          | -         | -         | -          | -         | -         | -          | -         | -         | - | - | - | - | - | - | - | - | - | - | - | - | - | - | - | - | - | - | - | - | - | - | - | - | - |
| <b>270</b>                    | 1                 | -                 | -         | -         | +          | -         | -         | -          | -         | -         | -          | -         | +         | - | - | - | - | - | - | - | - | - | - | - | - | - | - | - | - | - | - | - | + | - | - | - | - |   |
|                               | 2                 | -                 | -         | -         | -          | -         | -         | -          | -         | -         | -          | +         | -         | - | - | - | - | - | - | - | - | - | - | - | - | - | - | - | + | - | - | - | - | - | - | - | - | + |
|                               | 3                 | -                 | -         | -         | -          | -         | -         | -          | -         | -         | -          | -         | -         | - | - | - | + | - | - | - | - | - | - | - | - | - | - | - | - | - | - | - | - | - | - | - | - | - |
| <b>260</b>                    | 1                 | -                 | -         | -         | -          | -         | +         | -          | -         | -         | -          | -         | -         | - | - | - | - | - | - | - | - | - | - | - | - | - | - | - | - | - | - | - | - | - | - | - | + | - |
|                               | 2                 | -                 | -         | -         | -          | -         | -         | -          | -         | -         | -          | -         | -         | - | - | + | - | - | - | - | - | - | - | - | - | - | - | - | - | + | - | - | - | - | - | - | - | - |
|                               | 3                 | -                 | -         | +         | -          | -         | -         | -          | -         | -         | -          | -         | -         | - | - | - | - | - | - | - | - | - | - | - | - | - | - | + | - | - | - | + | - | - | - | - | - | - |
| <b>250</b>                    | 1                 | +                 | -         | -         | -          | -         | -         | -          | -         | -         | -          | -         | -         | - | - | - | - | - | - | - | - | - | - | - | - | - | - | - | - | - | - | - | - | - | - | - | + | - |
|                               | 2                 | -                 | -         | -         | -          | -         | -         | -          | -         | -         | -          | -         | -         | - | - | - | - | - | - | - | - | - | - | - | - | - | - | - | - | - | - | - | - | - | - | + | - | - |
